# Supplementary material for: Analysing 23 years of warm-season derechos in France: a climatology and investigation of synoptic and environmental changes
Source: Copernicus journal article supplement (doi:10.5194/wcd-5-439-2024), 2024-04-03
Supplement: Supplementary file 1 [file wcd-5-439-2024-supplement.pdf]

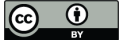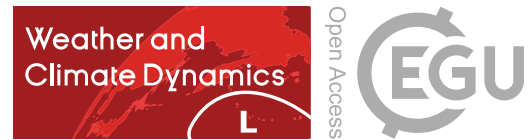

*Supplement of*

## **Analysing 23 years of warm-season derechos in France: a climatology and investigation of synoptic and environmental changes**

**Lucas Fery and Davide Faranda**

*Correspondence to:* Lucas Fery (lucas.fery@lscce.ipsl.fr)

The copyright of individual parts of the supplement might differ from the article licence.

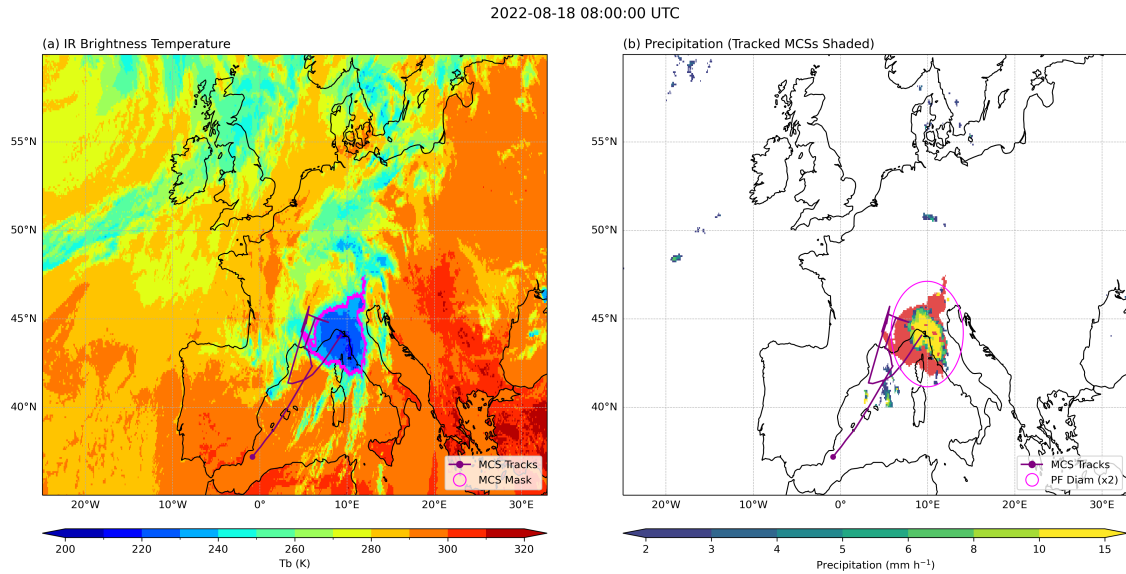

**Figure S1.** Snapshot of brightness temperature (a) and precipitation rate (b) from MERGIR (Janowiak et al., 2017) and IMERG (Huffman et al., 2019) datasets respectively. The left plot also shows the contour (in magenta) of the detected mesoscale convective system (MCS) using PyFLEXTRKR (Feng et al., 2023).

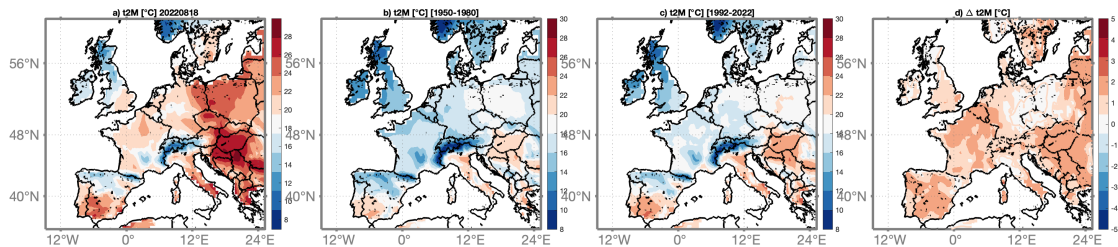

**Figure S2.** (a) Daily averaged 2 meter temperature (t2M) from E-OBS (Cornes et al., 2018) dataset for the 18 August 2022 event at 08:00 UTC. Average of t2M for the 37 analogues found for the 1950–1980 period (b) and 1992–2022 period. (d) Map of changes in  $\Delta$ T<sub>2m</sub> between factual and counterfactual periods (colored-filled areas show significant anomalies with respect to the bootstrap procedure).

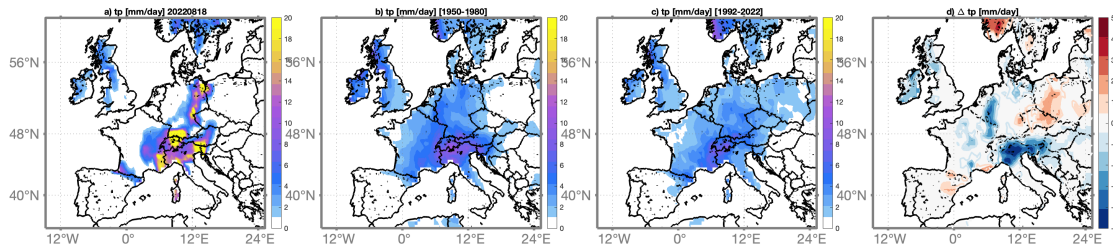

**Figure S3.** Same as S2 for total daily precipitation (tp) from EOBS.

## References

- Cornes, R. C., van der Schrier, G., van den Besselaar, E. J. M., and Jones, P. D.: An Ensemble Version of the E-OBS Temperature and Precipitation Data Sets, *Journal of Geophysical Research: Atmospheres*, 123, 9391–9409, <https://doi.org/10.1029/2017JD028200>, 2018.
- Feng, Z., Hardin, J., Barnes, H. C., Li, J., Leung, L. R., Varble, A., and Zhang, Z.: PyFLEXTRKR: A Flexible Feature Tracking Python Software for Convective Cloud Analysis, *Geoscientific Model Development*, 16, 2753–2776, <https://doi.org/10.5194/gmd-16-2753-2023>, 2023.
- Huffman, G., Stocker, E., Bolvin, D., Nelkin, E., and Jackson, T.: GPM IMERG Final Precipitation L3 Half Hourly 0.1 degree x 0.1 degree V06, Greenbelt, MD, Goddard Earth Sciences Data and Information Services Center (GES DISC), <https://doi.org/10.5067/GPM/IMERG/3B-HH/06>, 2019.
- 10 Janowiak, J., Joyce, B., and Xie, P.: NCEP/CPC L3 Half Hourly 4km Global (60S - 60N) Merged IR V1, Edited by Andrey Savtchenko, Greenbelt, MD, Goddard Earth Sciences Data and Information Services Center (GES DISC), <https://doi.org/10.5067/P4HZB9N27EKU>, 2017.
